# Supplementary material
Source: Springer Nature journal article supplement (https://www.springermedizin.de/resource/supplementary/12885_2012_3846_MOESM2_ESM.pdf/9464600)

**a**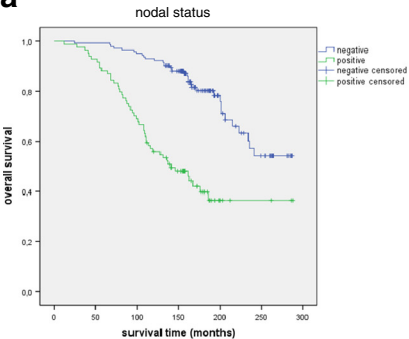**b**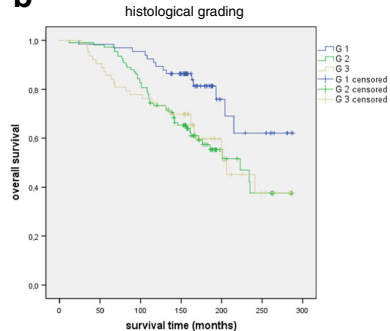**c**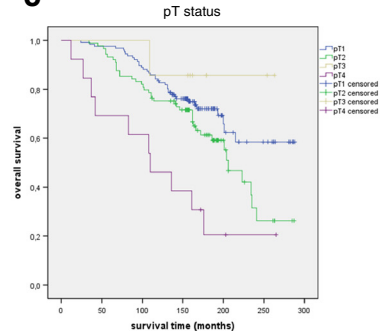**d**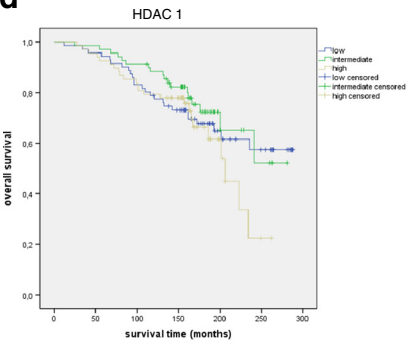**e**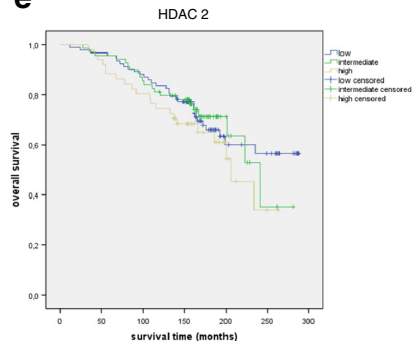**f**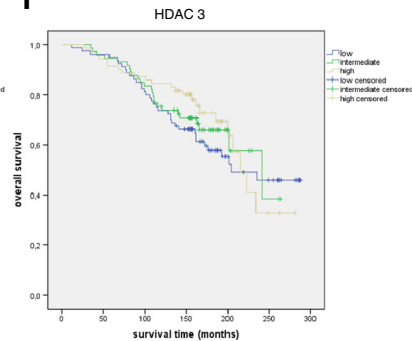

Supplement: MOESM2 [file 9464600]
